# Supplementary material for: New Cyanido-Bridged Heterometallic 3d-4f 1D Coordination Polymers: Synthesis, Crystal Structures and Magnetic Properties
Source: MDPI journal article supplement (doi:10.3390/magnetochemistry7050057), 2021-04-28
Supplement: s1 [file s1]

# Supplementary Material: New Cyanido-Bridged Heterometallic 3d-4f 1D Coordination Polymers: Synthesis, Crystal Structures and Magnetic Properties

Diana Dragancea <sup>1,2,\*</sup>, Ghenadie Novitchi <sup>3,\*</sup>, Augustin M. Mădălan <sup>1</sup> and Marius Andruh <sup>1,\*</sup>

<sup>1</sup> Inorganic Chemistry Laboratory, Faculty of Chemistry, University of Bucharest, Str. Dumbrova Rosie nr. 23, 020464 Bucharest, Romania; augustin.madalan@chimie.unibuc.ro

<sup>2</sup> Institute of Chemistry, Str. Academiei nr. 3, MD 2028 Chişinău, Republic of Moldova

<sup>3</sup> CNRS, University Grenoble Alpes, LNCMI, F-38000 Grenoble, France

\* Correspondence: ddragancea@gmail.com (D.D.); ghenadie.novitchi@lncmi.cnrs.fr (G.N.); marius.andruh@dnt.ro (M.A.)

**Table S1.** Crystallographic data, details of data collection and structure refinement parameters of compounds 1-3.

| Compound                                                                        | <b>1<sub>GdFe</sub></b>                                            | <b>2<sub>DyFe</sub></b>                                            | <b>3<sub>DyCo</sub></b>                                            |
|---------------------------------------------------------------------------------|--------------------------------------------------------------------|--------------------------------------------------------------------|--------------------------------------------------------------------|
| Formula                                                                         | C <sub>17</sub> H <sub>21</sub> FeGdN <sub>13</sub> O <sub>5</sub> | C <sub>17</sub> H <sub>25</sub> DyFeN <sub>13</sub> O <sub>7</sub> | C <sub>17</sub> H <sub>21</sub> DyCoN <sub>13</sub> O <sub>5</sub> |
| M (g·mol <sup>-1</sup> )                                                        | 700.57                                                             | 741.85                                                             | 708.90                                                             |
| Temperature (K)                                                                 | 293(2)                                                             | 293(2)                                                             | 293(2)                                                             |
| Wavelength (Å)                                                                  | 0.71073                                                            | 0.71073                                                            | 0.71073                                                            |
| Crystal system                                                                  | orthorhombic                                                       | monoclinic                                                         | orthorhombic                                                       |
| Space group                                                                     | P bca                                                              | P2 <sub>1</sub> /c                                                 | P bca                                                              |
| <i>a</i> (Å)                                                                    | 12.6342(5)                                                         | 12.7058(3)                                                         | 12.5194(2)                                                         |
| <i>b</i> (Å)                                                                    | 17.1373(8)                                                         | 12.6290(3)                                                         | 17.1163(3)                                                         |
| <i>c</i> (Å)                                                                    | 24.4164(9)                                                         | 17.2547(4)                                                         | 24.2330(5)                                                         |
| <i>α</i> (°)                                                                    | 90                                                                 | 90                                                                 | 90                                                                 |
| <i>β</i> (°)                                                                    | 90                                                                 | 103.466(2)                                                         | 90                                                                 |
| <i>γ</i> (°)                                                                    | 90                                                                 | 90                                                                 | 90                                                                 |
| <i>V</i> (Å <sup>3</sup> )                                                      | 5286.5(4)                                                          | 2692.60(11)                                                        | 5192.79(16)                                                        |
| <i>Z</i>                                                                        | 8                                                                  | 4                                                                  | 8                                                                  |
| <i>D<sub>c</sub></i> (g·cm <sup>-3</sup> )                                      | 1.760                                                              | 1.835                                                              | 1.814                                                              |
| <i>μ</i> (mm <sup>-1</sup> )                                                    | 3.089                                                              | 3.357                                                              | 3.549                                                              |
| <i>F</i> (0 0 0)                                                                | 2752                                                               | 1468                                                               | 2776                                                               |
| Goodness-of-fit (GOF) on <i>F</i> <sup>2</sup>                                  | 1.145                                                              | 1.042                                                              | 1.070                                                              |
| Final <i>R<sub>I</sub></i> , <i>wR<sub>2</sub></i> [ <i>I</i> > 2σ( <i>I</i> )] | 0.0520, 0.1081                                                     | 0.0189, 0.0439                                                     | 0.0208, 0.0480                                                     |
| <i>R<sub>I</sub></i> , <i>wR<sub>2</sub></i> (all data)                         | 0.0612, 0.1115                                                     | 0.0232, 0.0450                                                     | 0.0250, 0.0494                                                     |

**Table S2.** SHAPE measures of the 9-coordinate lanthanide polyhedra.

| Shape <sup>a,b</sup> | <b>1<sub>GdFe</sub></b> | <b>2<sub>DyFe</sub></b> | <b>3<sub>DyCo</sub></b> |
|----------------------|-------------------------|-------------------------|-------------------------|
| EP-9                 | 31.303                  | 31.929                  | 31.460                  |
| OPY-9                | 22.837                  | 23.736                  | 22.899                  |
| HBPY-9               | 16.116                  | 17.242                  | 16.445                  |
| JTC-9                | 15.267                  | 14.905                  | 15.030                  |
| JCCU-9               | 7.501                   | 8.256                   | 7.596                   |
| CCU-9                | 6.428                   | 7.159                   | 6.527                   |
| JCSAPR-9             | 4.007                   | 2.657                   | 3.677                   |
| CSAPR-9              | <b>2.888</b>            | <b>1.841</b>            | <b>2.677</b>            |
| JTCTPR-9             | 3.222                   | 2.456                   | 2.962                   |
| TCTPR-9              | 2.989                   | 1.944                   | 2.691                   |
| JTDIC-9              | 12.885                  | 12.794                  | 12.980                  |
| HH-9                 | 6.655                   | 8.182                   | 7.014                   |
| MFF-9                | 2.535                   | 2.077                   | 2.422                   |

<sup>a</sup> Abbreviations: EP-9, enneagon; OPY-9, octagonal pyramid; HBPY-9, Heptagonal bipyramid; JTC-9, Johnson triangular cupola J3; JCCU-9, capped cube J8; CCU-9, spherical-relaxed capped cube; JCSAPR-9, capped square antiprism J10; CSAPR-9, spherical capped square antiprism; JTCTPR-9, tricapped trigonal prism J51; TCTPR-9, spherical tricapped trigonal prism; JTDIC-9, tridiminished icosahedron J63; HH-9, hula-hoop; MFF-9, muffin.

<sup>b</sup> The values in boldface indicate the closest polyhedron according to the Continuous Shape Measures

**Table S3.** Selected bond distances (Å) and angles (°) for compounds **1-3**.

| <b>1<sub>GdFe</sub></b> |                 | <b>2<sub>DyFe</sub></b> |            | <b>3<sub>DyCo</sub></b> |            |
|-------------------------|-----------------|-------------------------|------------|-------------------------|------------|
| <b>Gd1–O1</b>           | <b>2.423(5)</b> | <b>Dy1–O1</b>           | 2.3652(18) | Dy1–O1                  | 2.398(2)   |
| Gd1–O2                  | 2.406(5)        | Dy1–O2                  | 2.3298(18) | Dy1–O2                  | 2.382(2)   |
| Gd1–O3                  | 2.330(5)        | Dy1–O3                  | 2.3783(13) | Dy1–O3                  | 2.308(2)   |
| Gd1–O4                  | 2.375(5)        | Dy1–O4                  | 2.3557(12) | Dy1–O4                  | 2.3518(19) |
| Gd1–N3                  | 2.598(6)        | Dy1–N3                  | 2.553(2)   | Dy1–N3                  | 2.574(2)   |
| Gd1–N4                  | 2.584(6)        | Dy1–N4                  | 2.503(2)   | Dy1–N4                  | 2.562(2)   |
| Gd1–N5                  | 2.592(6)        | Dy1–N5                  | 2.528(2)   | Dy1–N5                  | 2.567(2)   |
| Gd1–N8                  | 2.534(6)        | Dy1–N8                  | 2.556(2)   | Dy1–N8                  | 2.519(3)   |
| Gd1–N13                 | 2.566(6)        | Dy1–N13                 | 2.533(2)   | Dy1–N13                 | 2.544(3)   |
| Fe1–C12                 | 1.943(7)        | Fe1–C12                 | 1.957(3)   | Co1–C12                 | 1.898(3)   |
| Fe1–C13                 | 1.926(7)        | Fe1–C13                 | 1.945(3)   | Co1–C13                 | 1.886(3)   |
| Fe1–C14                 | 1.945(9)        | Fe1–C14                 | 1.943(3)   | Co1–C14                 | 1.908(3)   |
| Fe1–C15                 | 1.921(7)        | Fe1–C15                 | 1.948(3)   | Co1–C15                 | 1.898(3)   |
| Fe1–C16                 | 1.948(9)        | Fe1–C16                 | 1.929(3)   | Co1–C16                 | 1.905(3)   |
| Fe1–C17                 | 1.960(7)        | Fe1–C17                 | 1.949(3)   | Co1–C17                 | 1.915(3)   |
| Gd1–C12–N8              | 154.4(5)        | Dy1–C12–N8              | 159.2(2)   | Dy1–C12–N8              | 155.3(2)   |
| Gd1–C17–N13             | 158.5(6)        | Dy1–C17–N13             | 154.3(2)   | Dy1–C17–N13             | 159.0(2)   |
| O1–Gd1–O2               | 102.03(17)      | O1–Dy1–O2               | 96.21(7)   | O1–Dy1–O2               | 100.18(7)  |
| O1–Gd1–N3               | 62.37(17)       | O1–Dy1–N3               | 63.57(7)   | O1–Dy1–N3               | 62.91(7)   |
| O2–Gd1–N5               | 62.80(18)       | O2–Dy1–N5               | 64.18(7)   | O2–Dy1–N5               | 63.27(7)   |
| N3–Gd1–N4               | 60.77(19)       | N3–Dy1–N4               | 61.66(7)   | N3–Dy1–N4               | 61.12(8)   |
| N5–Gd1–N4               | 60.41(19)       | N5–Dy1–N4               | 61.92(7)   | N5–Dy1–N4               | 60.94(8)   |
| O4–Gd1–O3               | 121.2(2)        | O4–Dy1–O3               | 129.69(6)  | O4–Dy1–O3               | 123.11(9)  |
| O1–Gd1–O4               | 69.35(16)       | O1–Dy1–O4               | 72.64(5)   | O1–Dy1–O4               | 69.17(7)   |
| N8–Gd1–N13              | 74.31(19)       | N8–Dy1–N13              | 74.54(7)   | N8–Dy1–N13              | 74.96(8)   |

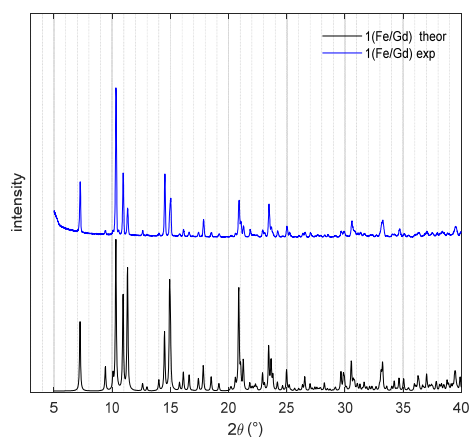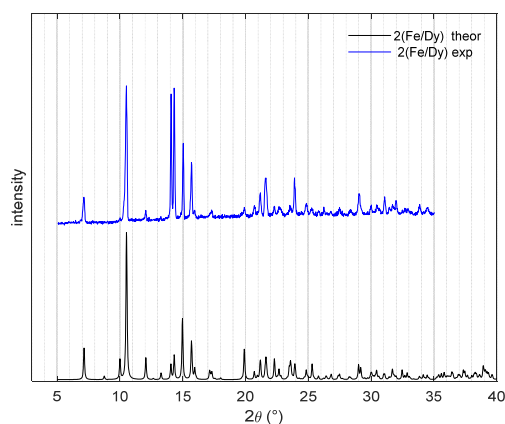

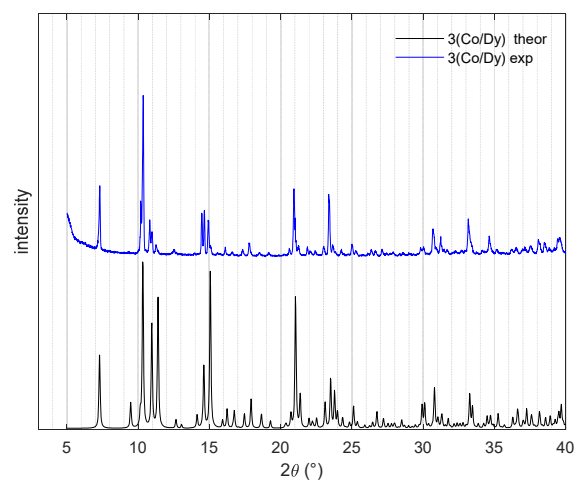

**Figure S1.** The experimental (blue) and simulated (black) powder X-ray diffraction patterns for **1**GdFe, **2**DyFe, **3**DyCo.

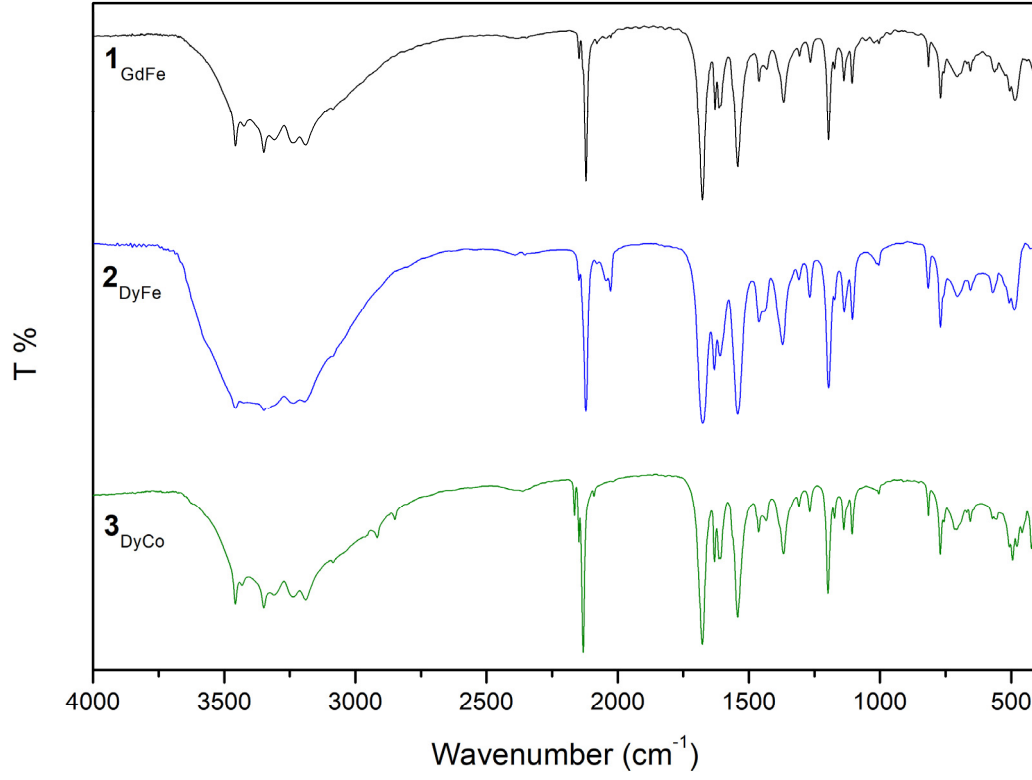

**Figure S2.** The FTIR spectra for **1**GdFe, **2**DyFe, **3**DyCo.

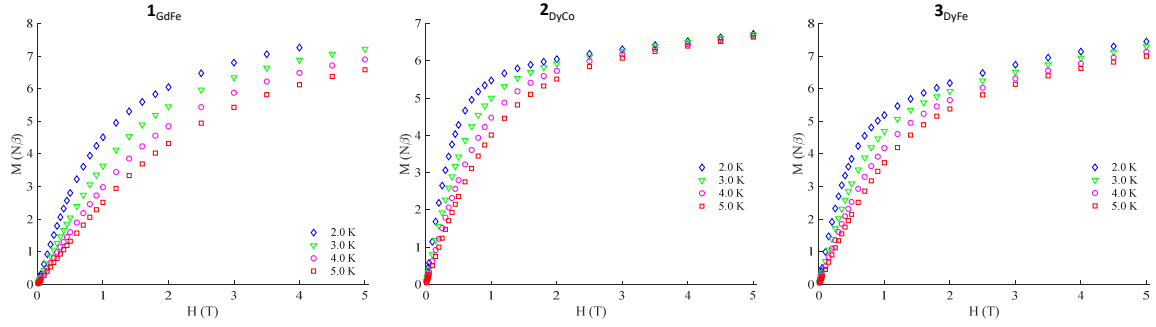

**Figure S3.** Isothermal magnetization (M) curves for complexes **1**GdFe, **2**DyFe, **3**DyCo, and in the 2 to 5 K range.

Mathematical expressions for *ac* susceptibility given by the generalized Debye model for two relaxation processes:

$$\chi'(\omega) = \chi_{S,tot} + \Delta\chi_1 \frac{1+(\omega\tau_1)^{1-\alpha_1} \sin\left(\frac{\pi\alpha_1}{2}\right)}{1+(\omega\tau_1)^{1-\alpha_1} \sin\left(\frac{\pi\alpha_1}{2}\right) + (\omega\tau_1)^{(2-2\alpha_1)}} + \Delta\chi_2 \frac{1+(\omega\tau_2)^{1-\alpha_2} \sin\left(\frac{\pi\alpha_2}{2}\right)}{1+(\omega\tau_2)^{1-\alpha_2} \sin\left(\frac{\pi\alpha_2}{2}\right) + (\omega\tau_2)^{(2-2\alpha_2)}} \quad (\text{eq. S1})$$

$$\chi''(\omega) = \Delta\chi_1 \frac{1+(\omega\tau_1)^{1-\alpha_1} \cos\left(\frac{\pi\alpha_1}{2}\right)}{1+(\omega\tau_1)^{1-\alpha_1} \sin\left(\frac{\pi\alpha_1}{2}\right) + (\omega\tau_1)^{(2-2\alpha_1)}} + \Delta\chi_2 \frac{1+(\omega\tau_2)^{1-\alpha_2} \cos\left(\frac{\pi\alpha_2}{2}\right)}{1+(\omega\tau_2)^{1-\alpha_2} \sin\left(\frac{\pi\alpha_2}{2}\right) + (\omega\tau_2)^{(2-2\alpha_2)}} \quad (\text{eq. S2})$$

where  $\omega = 2\pi\nu$

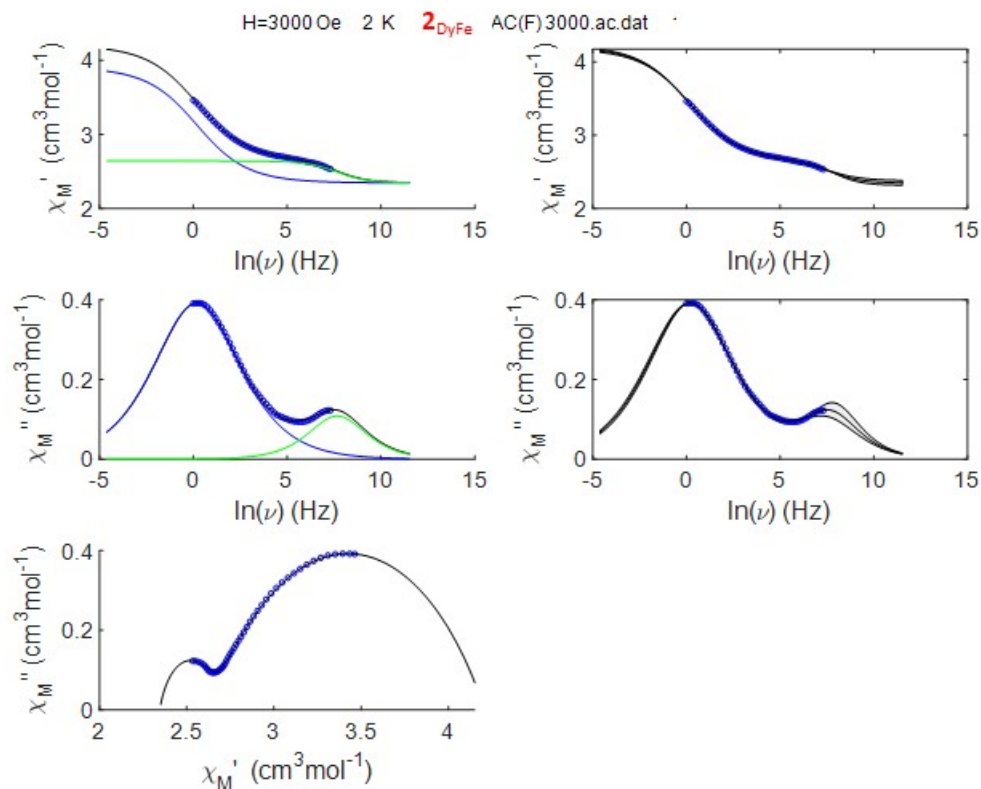

**Figure S4.** Example *ac* susceptibility analysis of frequency sweeping measurements for **2<sub>DyFe</sub>** using extended Debye model for two relaxation processes. (eq. S1, 2). The contribution of two-relaxation processes depicted in blue and green. The 95% confidence intervals depicted in the right in the gray color.

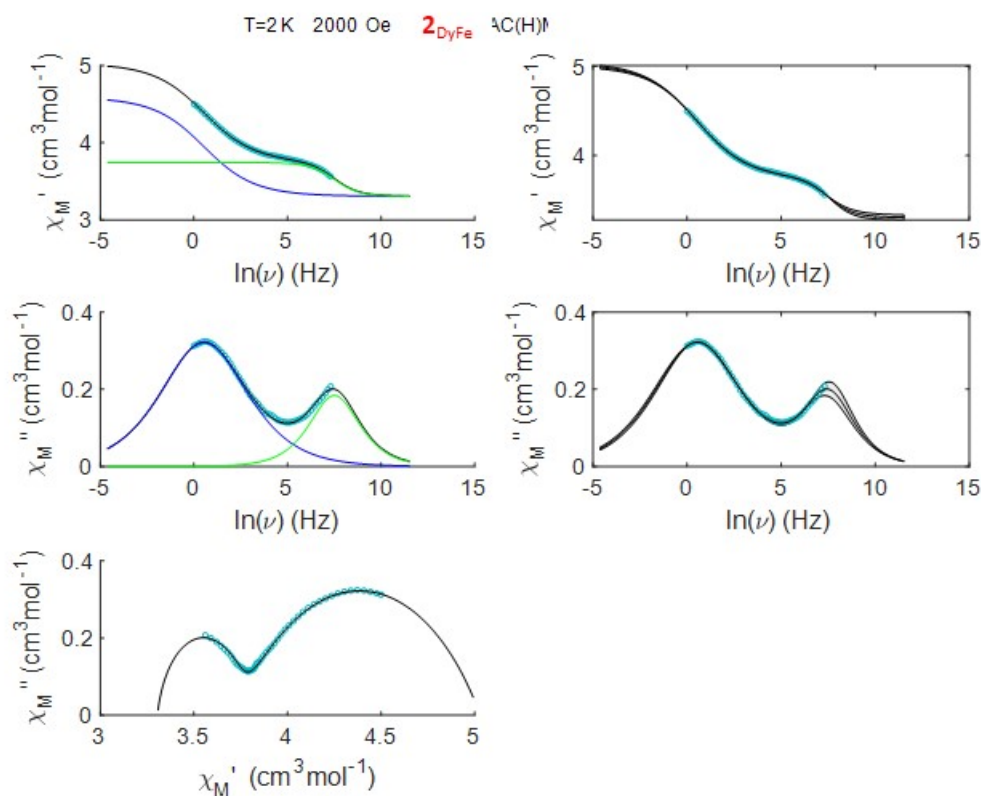

**Figure S5.** Example *ac* susceptibility analysis of field sweeping measurements for  $2\text{DyFe}$  using extended Debye model for two relaxation processes. (eq. S1, 2). The contribution of two-relaxation processes depicted in blue and green. The 95% confidence intervals depicted in the right in the gray color.

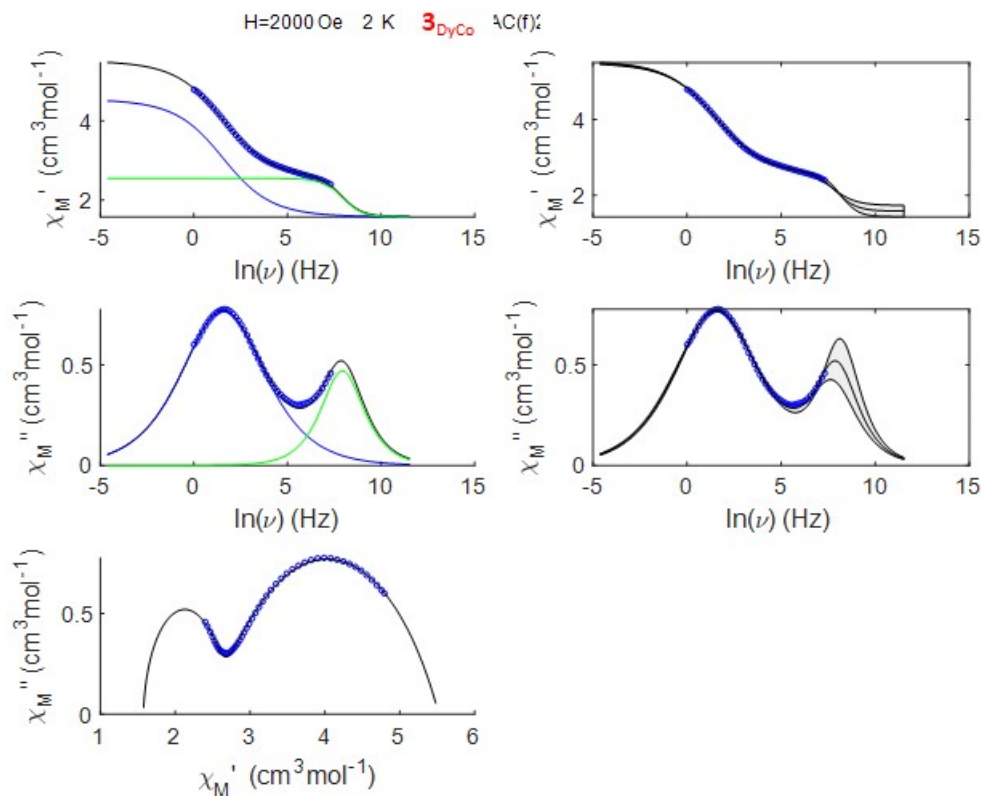

**Figure S6.** Example *ac* susceptibility analysis of frequency sweeping measurements for  $3\text{DyCo}$  using extended Debye model for two relaxation processes. (eq. S1, 2). The contribution of two-relaxation processes depicted in blue and green. The 95% confidence intervals depicted in the right in the gray color.

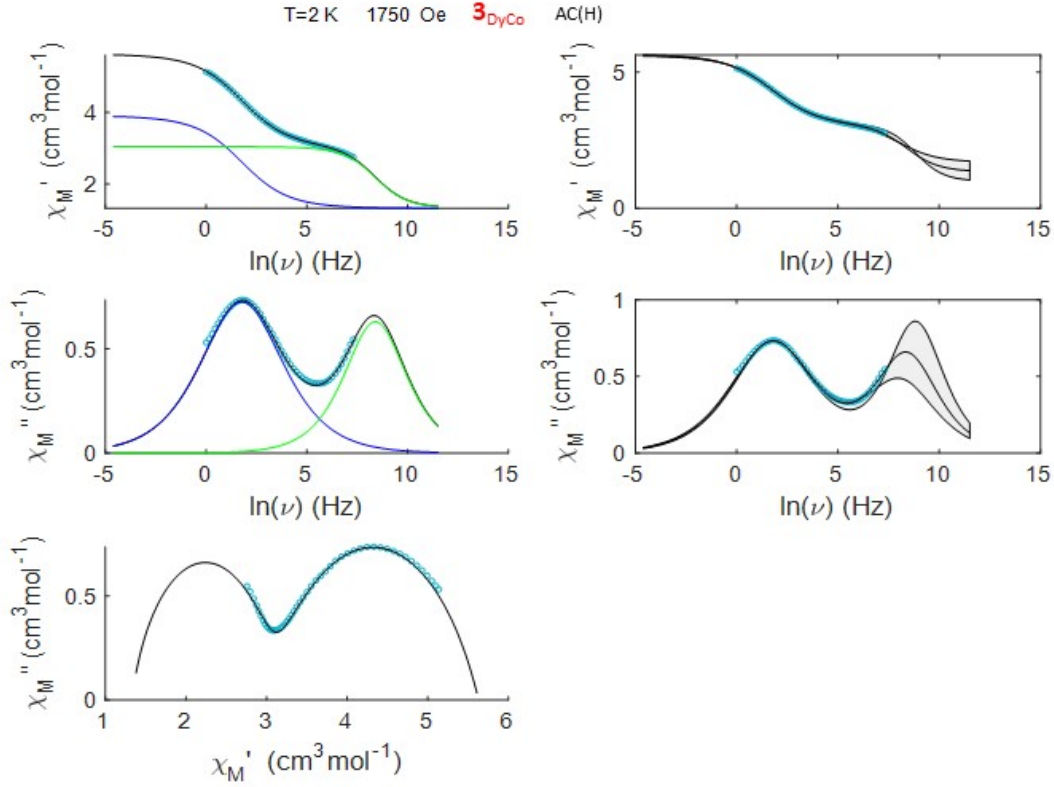

**Figure S7.** Example *ac* susceptibility analysis of field sweeping measurements for  $3_{\text{DyCo}}$  using extended Debye model for two relaxation processes. (eq. S1, 2). The contribution of two-relaxation processes depicted in blue and green. The 95% confidence intervals depicted in the right in the gray color.

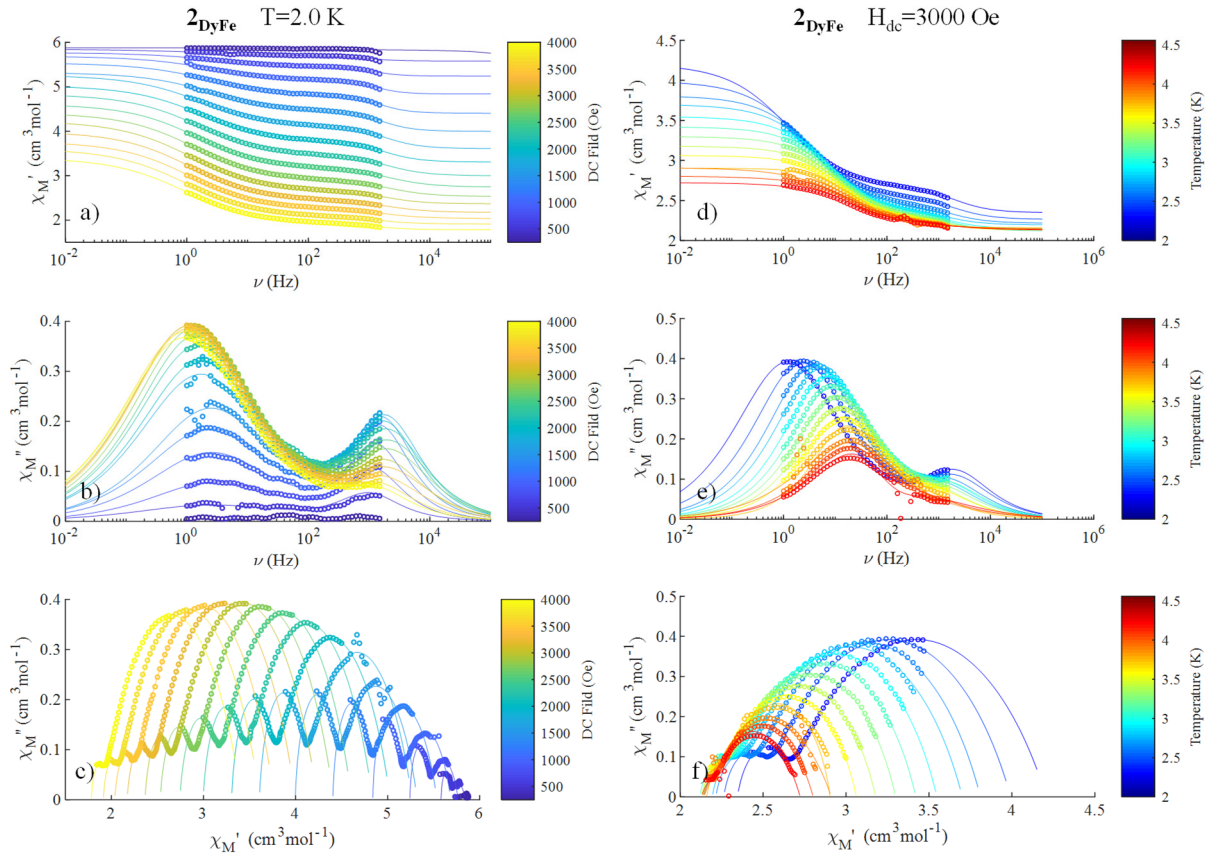



**Figure S8.** Field dependence (left) and temperature dependence (right) of *ac* susceptibility ( $H_{ac}=3.0$  Oe) and Cole-Cole plots (c) and f)) for  $2_{DyFe}$  at indicated temperatures and fields. The solid lines represented the best fits according the generalized Debye model for two relaxations process (eq. S1,2).

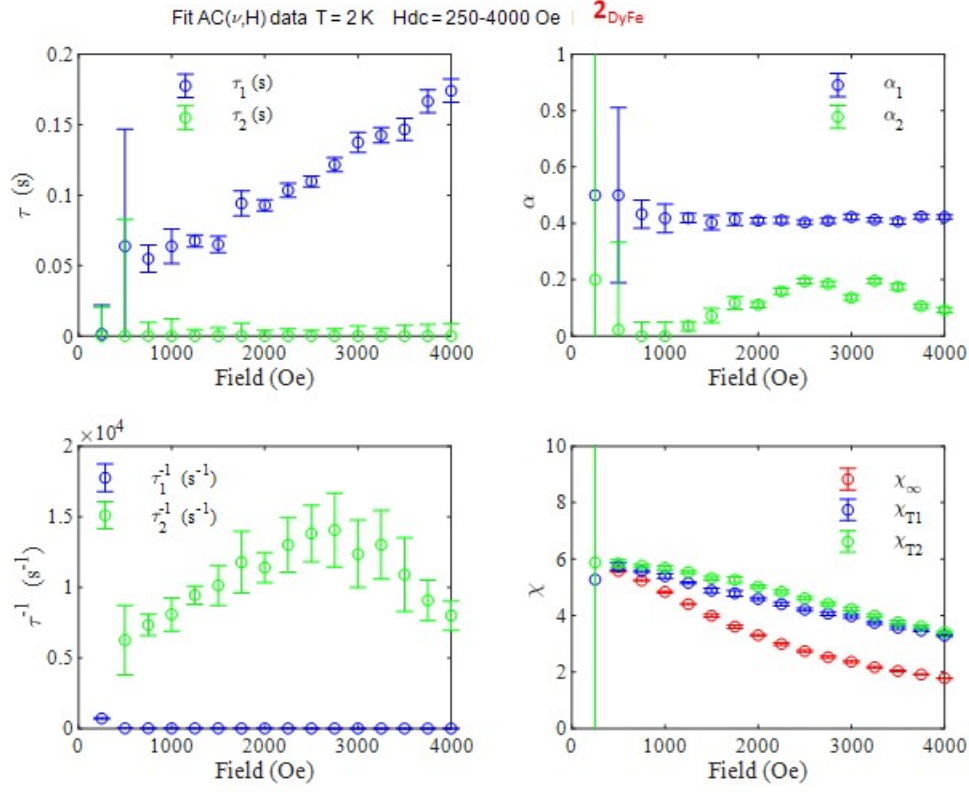

**Figure S9.** Graphical representation of variable parameters deduced from the best fits of the *ac* susceptibility of  $2_{DyFe}$  collected with a 3.0 Oe *ac* field oscillating under different fields (see Figure 8 main text).



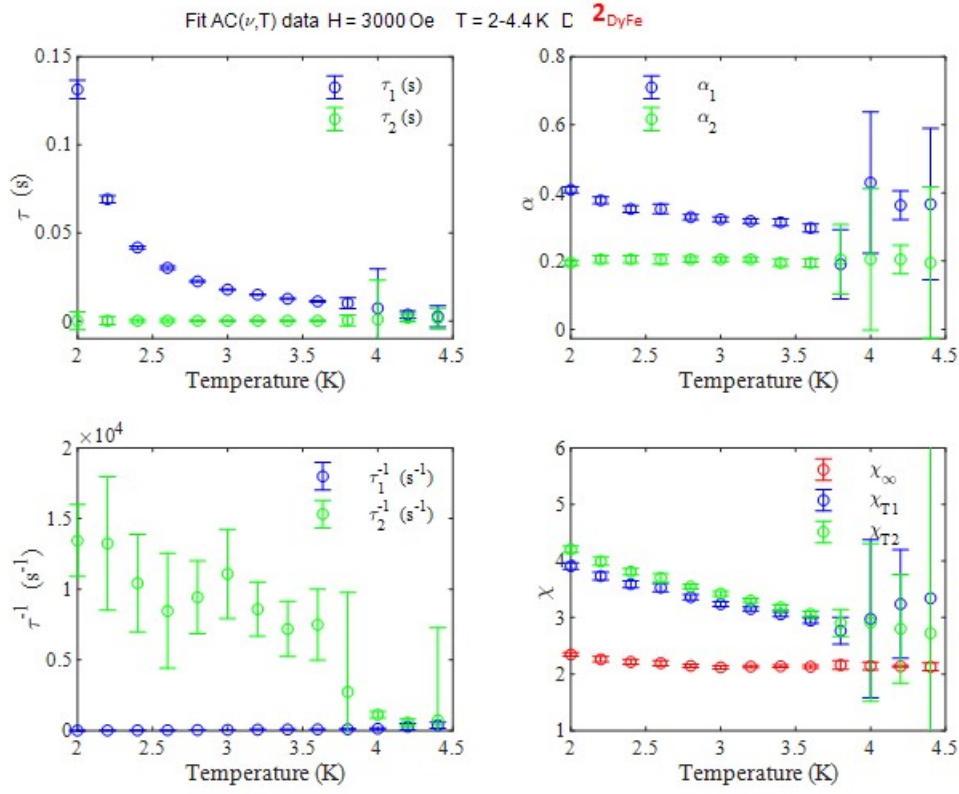

**Figure S10.** Graphical representation of variable parameters deduced from the best fits of the *ac* susceptibility of  $\text{2DyFe}$  collected with a 3.0 Oe *ac* field oscillating for deferent temperatures (see Figure 8 main text).

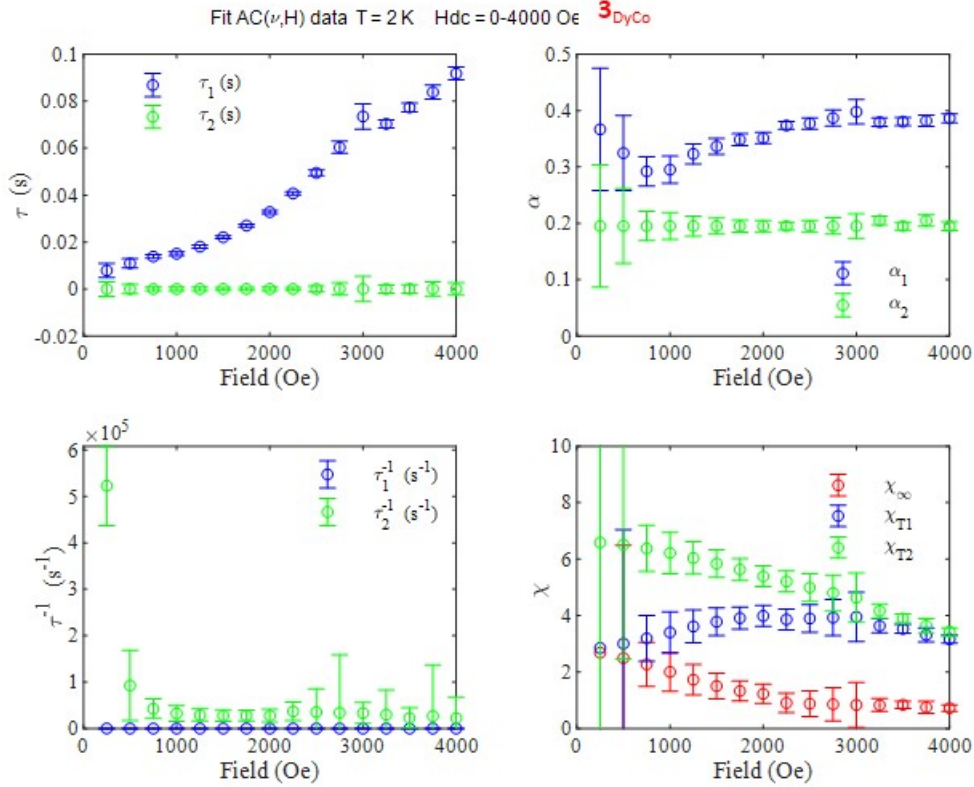

**Figure S11.** Graphical representation of variable parameters deduced from the best fits of the *ac* susceptibility of  $\text{3DyCo}$  collected with a 3.0 Oe *ac* field oscillating under different fields (see Figure 8 main text).

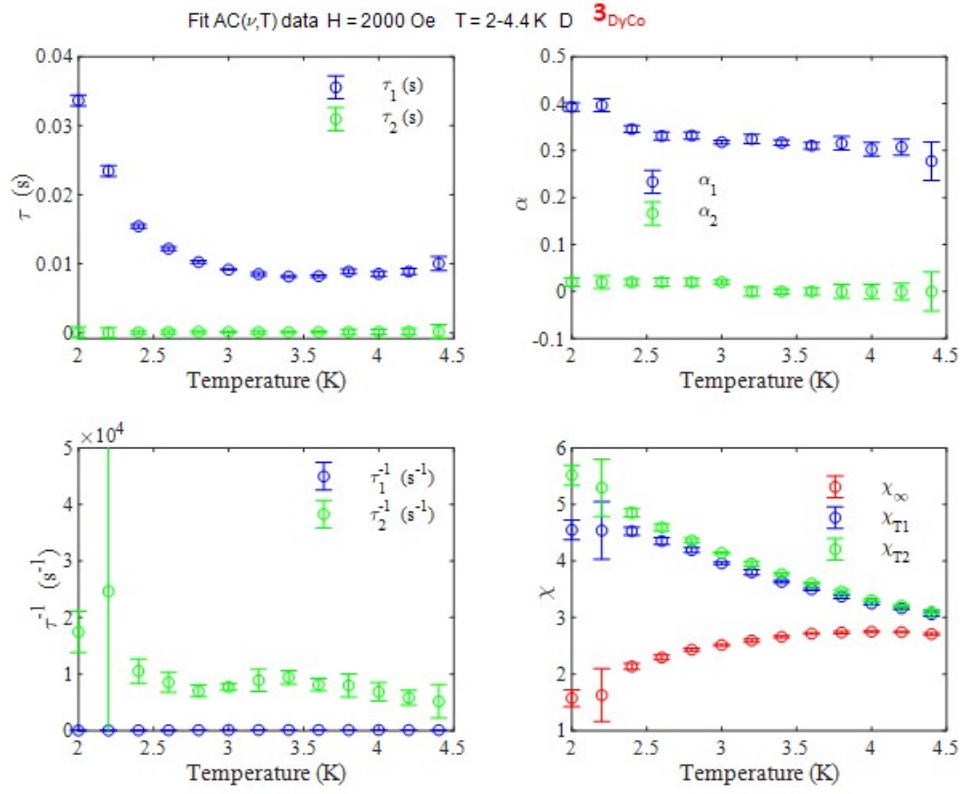

**Figure S12.** Graphical representation of variable parameters deduced from the best fits of the *ac* susceptibility of  $3\text{DyCo}$  collected with a 3.0 Oe *ac* field oscillating for different temperatures (see Figure 8 main text).

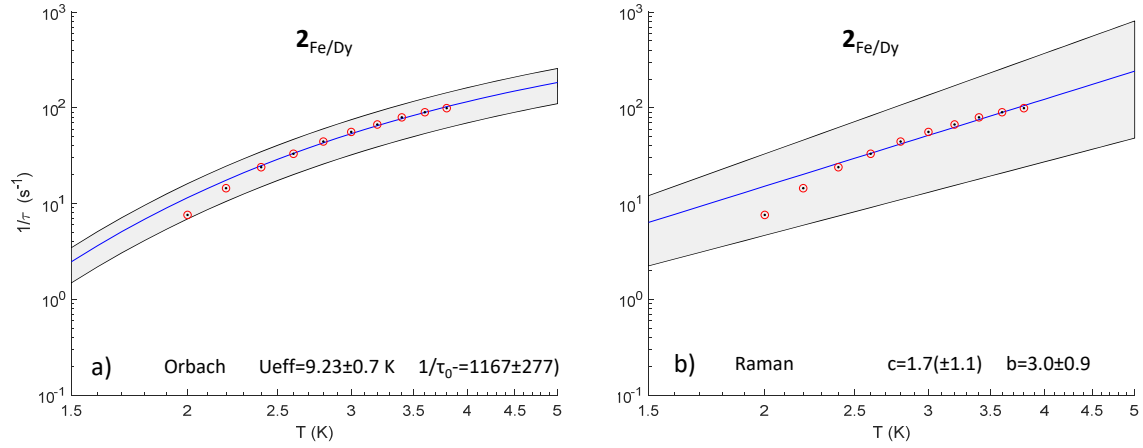

**Figure S13.** Temperature dependence of relaxation times for  $2_{\text{DyFe}}$ . The blues solid lines correspond to the fit for a) Orbach and b) Raman mechanisms of magnetic relaxation. The 95% confidence intervals are depicted on the right (gray color).

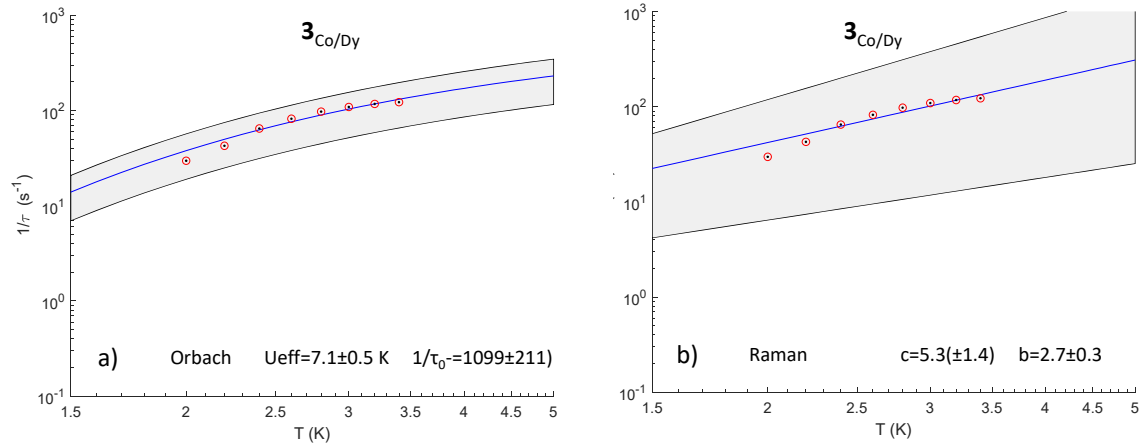

**Figure S14.** Temperature dependence of relaxation times for  $3_{\text{DyCo}}$ . The blues solid lines correspond to the fit for a) Orbach and b) Raman mechanisms of magnetic relaxation. The 95% confidence intervals are depicted on the right (gray color).

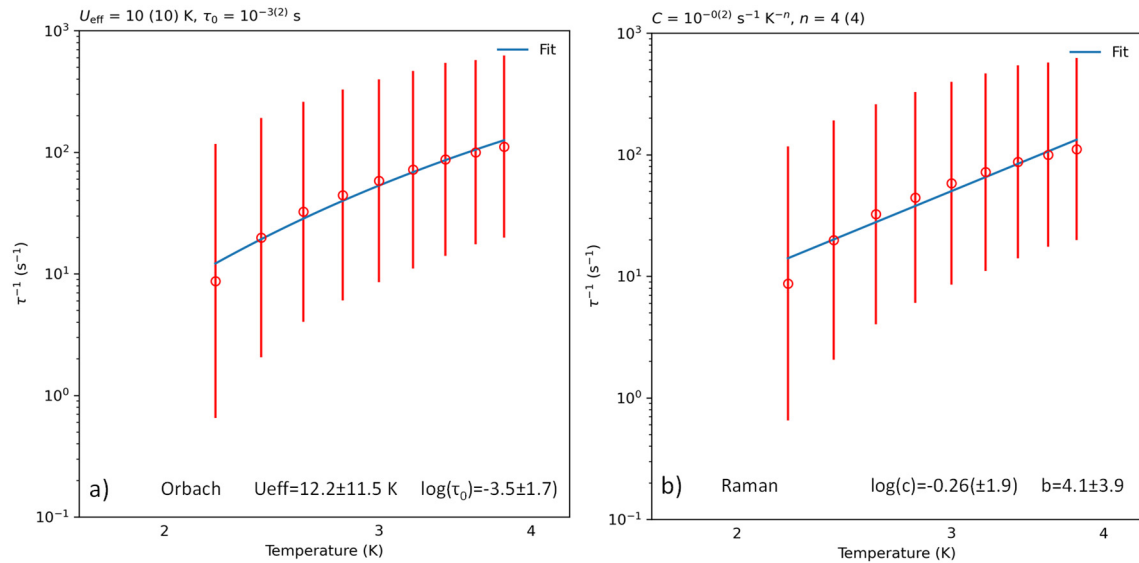

**Figure S15.** Temperature dependence of relaxation times for  $2_{\text{DyFe}}$ . The blues solid lines correspond to the fit for a) Orbach and b) Raman mechanisms of magnetic relaxation. Red line are error bars generated by *CC-FIT2 software* [ref. *Phys. Chem. Chem. Phys.*, 2019,21, 23567-23575].
